# Supplementary material
Source: PubMed Central journal article supplement (PMC5402891)
Supplement: NIHMS764670-supplement-supplement_1.pdf [file NIHMS764670-supplement-supplement_1.pdf]

SUPPLEMENTAL APPENDICES

**SUPPLEMENTAL TABLE 1. Zhan Criteria Drugs by Classification of Appropriateness for the Elderly**

|                      |                      |                  |
|----------------------|----------------------|------------------|
| Some Indications     | Amitriptyline        |                  |
|                      | Doxepin              |                  |
|                      | Indomethacin         |                  |
|                      | Dipyridamole         |                  |
|                      | Ticlopidine          |                  |
|                      | Methyldopa           |                  |
|                      | Reserpine            |                  |
|                      | Disopyramide         |                  |
|                      | Oxybutynin           |                  |
|                      | Chlorpheniramine     |                  |
|                      | Cyproheptadine       |                  |
|                      | Diphenhydramine      |                  |
|                      | Hydroxyzine          |                  |
|                      | Promethazine         |                  |
|                      | Rarely Appropriate   | Chlordiazepoxide |
| Diazepam             |                      |                  |
| Propoxyphene         |                      |                  |
| Carisoprodol         |                      |                  |
| Chlorzoxazone        |                      |                  |
| Cyclobenzaprine      |                      |                  |
| Metaxalone           |                      |                  |
| Methocarbamol        |                      |                  |
| Always Inappropriate |                      | Butabarbital     |
|                      |                      | Secobarbital     |
|                      | Pentobarbital        |                  |
|                      | Flurazepam           |                  |
|                      | Meprobamate          |                  |
|                      | Chlorpropamide       |                  |
|                      | Meperidine           |                  |
|                      | Pentazocine          |                  |
|                      | Trimethobenzamide    |                  |
|                      | Belladonna alkaloids |                  |
| Dicyclomine          |                      |                  |
| Hyoscyamine          |                      |                  |
| Propantheline        |                      |                  |

1  
2  
3  
4  
5  
6  
7  
8  
9  
10  
11  
12  
13  
14  
15  
16  
17  
18  
19  
20  
21  
22  
23  
24  
25  
26  
27  
28  
29  
30  
31  
32  
33  
34  
35  
36  
37  
38  
39  
40  
41  
42  
43  
44  
45  
46  
47  
48  
49  
50  
51  
52  
53  
54  
55  
56  
57  
58  
59  
60

**SUPPLEMENTAL TABLE 2. Most Commonly Prescribed Zhan Criteria Drug Classes, 2006-7**

| DRUG CLASS                | DRUG             |
|---------------------------|------------------|
| Antihistamine             | Chlorpheniramine |
|                           | Cyproheptadine   |
|                           | Diphenhydramine  |
|                           | Hydroxyzine      |
|                           | Promethazine     |
| Opiates                   | Meperidine       |
|                           | Pentazocine      |
|                           | Propoxyphene     |
| Skeletal Muscle Relaxants | Carisoprodol     |
|                           | Chlorzoxazone    |
|                           | Cyclobenzaprine  |
|                           | Metaxalone       |
|                           | Methocarbamol    |

Confidential - For Review Only

**SUPPLEMENTAL TABLE 3. Patient, Community, and Insurance Plan Characteristics of MA Enrollees by Number of Dispensings for High-Risk Drugs**

|                                                                | 1 High-Risk Drug Dispensing | >4 High-Risk Drug Dispensings |
|----------------------------------------------------------------|-----------------------------|-------------------------------|
| <b>N (%)</b>                                                   | 8,117 (67.4)                | 800 (6.6)                     |
| <b>PATIENT CHARACTERISTICS</b>                                 |                             |                               |
| <b>Mean Age, y (SD)*</b>                                       | 75.0 (6.6)                  | 76.2 (6.9)                    |
| <b>Female, % *</b>                                             | 64                          | 72                            |
| <b>Race, %</b>                                                 |                             |                               |
| White                                                          | 87                          | 87                            |
| Black                                                          | 8                           | 9                             |
| Other                                                          | 5                           | 4                             |
| <b>Married, % *</b>                                            | 55                          | 47                            |
| <b>Annual Household Income &lt;\$10,000, % *</b>               | 15                          | 18                            |
| <b>Any College Education, %</b>                                | 34                          | 31                            |
| <b>Self Reported General Health, % *</b>                       |                             |                               |
| Excellent/Very Good                                            | 26                          | 19                            |
| Good/Fair/Poor                                                 | 74                          | 81                            |
| <b>Limitation in Moderate Activity, % *</b>                    |                             |                               |
| No Limitation                                                  | 40                          | 28                            |
| Any Limitation                                                 | 60                          | 72                            |
| <b>Mean Number of Chronic Conditions (SD)*</b>                 | 3.3 (2.1)                   | 3.8 (2.2)                     |
| <b>Mean Number of Unique Prescriptions (SD)*</b>               | 11.6 (6.0)                  | 12.4 (6.2)                    |
| <b>Mean Number of Unique Zhan High-Risk Prescriptions (SD)</b> | 1.2 (0.4)                   | 1.2 (0.5)                     |
| <b>Mean Physical Component Summary (PCS) Score (SD)*</b>       | 38.1 (11.9)                 | 34.2 (12.0)                   |
| <b>Mean Mental Component Summary (MCS) Score (SD)*</b>         | 51.3 (11.2)                 | 49.5 (12.3)                   |
| <b>COMMUNITY CHARACTERISTICS</b>                               |                             |                               |
| <b>Mean Percentage of White Residents (SD)*</b>                | 78.4 (19.7)                 | 80.6 (17.2)                   |
| <b>Mean Percentage of Elderly Residents (SD)</b>               | 13.3 (3.4)                  | 13.6 (3.3)                    |
| <b>Mean Percentage of Residents under Poverty Line (SD)*</b>   | 12.0 (4.5)                  | 12.5 (4.3)                    |
| <b>Mean Household Income (SD)*</b>                             | \$49,849 (\$13,989)         | \$48,802 (\$11,809)           |
| <b>Mean # MDs Per/1000 Residents (SD)</b>                      | 3.0 (1.8)                   | 2.9 (1.9)                     |
| <b>PLAN CHARACTERISTICS</b>                                    |                             |                               |
| <b>Model Type, %</b>                                           |                             |                               |
| Staff/Group                                                    | 12                          | 11                            |
| Non-Staff/Non-Group                                            | 88                          | 89                            |
| <b>Profit Status, % *</b>                                      |                             |                               |
| Not For Profit                                                 | 29                          | 33                            |
| For Profit                                                     | 71                          | 67                            |
| <b>Years Participating in Medicare*</b>                        |                             |                               |
| <5                                                             | 27                          | 23                            |
| 5-10                                                           | 29                          | 32                            |
| ≥10                                                            | 44                          | 45                            |
| <b>Population Served*</b>                                      |                             |                               |
| <4,845                                                         | 22                          | 26                            |
| 4,845 – 16,295                                                 | 24                          | 28                            |
| 16,296 – 32,390                                                | 27                          | 23                            |
| >32,390                                                        | 27                          | 23                            |

\* p-value <0.05

**SUPPLEMENTAL TABLE 4. Adjusted Odds of Receiving a High-Risk Prescription by Zhan Classification of Appropriateness among Elderly Medicare Advantage Beneficiaries**

|                                               | Sometimes Indicated |             |    |             | Rarely Appropriate |             |    |             | Always Inappropriate |             |    |             |
|-----------------------------------------------|---------------------|-------------|----|-------------|--------------------|-------------|----|-------------|----------------------|-------------|----|-------------|
|                                               | OR                  | 95% CI      |    |             | OR                 | 95% CI      |    |             | OR                   | 95% CI      |    |             |
| <b>N</b>                                      | 1,394               |             |    |             | 7,653              |             |    |             | 5,895                |             |    |             |
| <b>PATIENT CHARACTERISTICS</b>                |                     |             |    |             |                    |             |    |             |                      |             |    |             |
| <b>Age*</b>                                   |                     |             |    |             |                    |             |    |             |                      |             |    |             |
| 65-69                                         | Ref.                | --          |    |             | Ref.               | --          |    |             | Ref.                 | --          |    |             |
| 70-74                                         | 0.96                | 0.88        | to | 1.05        | <b>0.89</b>        | <b>0.82</b> | to | <b>0.97</b> | <b>0.84</b>          | <b>0.71</b> | to | <b>0.99</b> |
| 75-79                                         | 1.07                | 0.98        | to | 1.17        | <b>0.89</b>        | <b>0.82</b> | to | <b>0.95</b> | <b>0.82</b>          | <b>0.69</b> | to | <b>0.97</b> |
| 80-85                                         | 0.99                | 0.90        | to | 1.10        | <b>0.81</b>        | <b>0.73</b> | to | <b>0.89</b> | <b>0.73</b>          | <b>0.59</b> | to | <b>0.90</b> |
| >85                                           | <b>0.86</b>         | <b>0.75</b> | to | <b>0.98</b> | <b>0.59</b>        | <b>0.52</b> | to | <b>0.67</b> | <b>0.61</b>          | <b>0.46</b> | to | <b>0.80</b> |
| <b>Sex</b>                                    |                     |             |    |             |                    |             |    |             |                      |             |    |             |
| Male                                          | Ref.                | --          |    |             | Ref.               | --          |    |             | Ref.                 | --          |    |             |
| Female                                        | <b>1.19</b>         | <b>1.11</b> | to | <b>1.28</b> | <b>1.46</b>        | <b>1.38</b> | to | <b>1.55</b> | <b>1.80</b>          | <b>1.57</b> | to | <b>2.07</b> |
| <b>Race</b>                                   |                     |             |    |             |                    |             |    |             |                      |             |    |             |
| White                                         | Ref.                | --          |    |             | Ref.               | --          |    |             | Ref.                 | --          |    |             |
| Black                                         | 1.04                | 0.93        | to | 1.17        | 0.92               | 0.83        | to | 1.03        | <b>0.47</b>          | <b>0.34</b> | to | <b>0.65</b> |
| Other                                         | 1.08                | 0.93        | to | 1.25        | 0.88               | 0.75        | to | 1.03        | 0.93                 | 0.65        | to | 1.33        |
| <b>Marital Status</b>                         |                     |             |    |             |                    |             |    |             |                      |             |    |             |
| Single/Widowed/Divorced                       | Ref.                | --          |    |             | Ref.               | --          |    |             | Ref.                 | --          |    |             |
| Married                                       | 1.04                | 0.97        | to | 1.12        | 1.05               | 0.99        | to | 1.13        | 1.16                 | 1.00        | to | 1.36        |
| <b>Annual Household Income</b>                |                     |             |    |             |                    |             |    |             |                      |             |    |             |
| <\$10,000                                     | Ref.                | --          |    |             | Ref.               | --          |    |             | Ref.                 | --          |    |             |
| \$10,000 - \$19,999                           | <b>0.89</b>         | <b>0.80</b> | to | <b>0.99</b> | 1.03               | 0.94        | to | 1.12        | 0.97                 | 0.81        | to | 1.17        |
| \$20,000 - \$29,999                           | <b>0.87</b>         | <b>0.78</b> | to | <b>0.98</b> | 0.93               | 0.85        | to | 1.02        | 1.13                 | 0.91        | to | 1.39        |
| ≥\$30,000                                     | <b>0.86</b>         | <b>0.80</b> | to | <b>0.96</b> | 0.95               | 0.86        | to | 1.05        | 1.05                 | 0.84        | to | 1.33        |
| <b>Education</b>                              |                     |             |    |             |                    |             |    |             |                      |             |    |             |
| No College Education                          | Ref.                | --          |    |             | Ref.               | --          |    |             | Ref.                 | --          |    |             |
| Any College Education                         | <b>0.93</b>         | <b>0.87</b> | to | <b>0.99</b> | 0.99               | 0.93        | to | 1.05        | 1.08                 | 0.95        | to | 1.17        |
| <b>Physical Component Summary (PCS) Score</b> |                     |             |    |             |                    |             |    |             |                      |             |    |             |
| Q1: <30                                       | Ref.                | --          |    |             | Ref.               | --          |    |             | Ref.                 | --          |    |             |
| Q2: 30 – 40                                   | <b>0.84</b>         | <b>0.77</b> | to | <b>0.92</b> | <b>0.82</b>        | <b>0.76</b> | to | <b>0.88</b> | 1.00                 | 0.86        | to | 1.17        |
| Q3: 41 – 49                                   | <b>0.72</b>         | <b>0.66</b> | to | <b>0.79</b> | <b>0.71</b>        | <b>0.65</b> | to | <b>0.78</b> | 0.85                 | 0.71        | to | 1.02        |
| Q4: >49                                       | <b>0.63</b>         | <b>0.57</b> | to | <b>0.70</b> | <b>0.56</b>        | <b>0.51</b> | to | <b>0.62</b> | <b>0.71</b>          | <b>0.58</b> | to | <b>0.88</b> |
| <b>Mental Component Summary (MCS) Score</b>   |                     |             |    |             |                    |             |    |             |                      |             |    |             |
| Q1: <45                                       | Ref.                | --          |    |             | Ref.               | --          |    |             | Ref.                 | --          |    |             |
| Q2: 45 – 55                                   | <b>0.86</b>         | <b>0.80</b> | to | <b>0.92</b> | 0.95               | 0.87        | to | 1.02        | 0.86                 | 0.73        | to | 1.01        |
| Q3: 56 – 60                                   | <b>0.83</b>         | <b>0.75</b> | to | <b>0.92</b> | 0.93               | 0.85        | to | 1.02        | 0.86                 | 0.72        | to | 1.03        |
| Q4: >60                                       | <b>0.74</b>         | <b>0.68</b> | to | <b>0.81</b> | <b>0.89</b>        | <b>0.82</b> | to | <b>0.97</b> | <b>0.65</b>          | <b>0.54</b> | to | <b>0.79</b> |
| <b>Number of Chronic Conditions</b>           |                     |             |    |             |                    |             |    |             |                      |             |    |             |
| <Median (<3)                                  | Ref.                | --          |    |             | Ref.               | --          |    |             | Ref.                 | --          |    |             |
| ≥Median (≥3)                                  | <b>1.26</b>         | <b>1.16</b> | to | <b>1.37</b> | <b>1.30</b>        | <b>1.22</b> | to | <b>1.39</b> | <b>1.32</b>          | <b>1.14</b> | to | <b>1.53</b> |
| <b>COMMUNITY CHARACTERISTICS</b>              |                     |             |    |             |                    |             |    |             |                      |             |    |             |
| <b>County % Population White</b>              |                     |             |    |             |                    |             |    |             |                      |             |    |             |
| Q1: <74.1                                     | Ref.                | --          |    |             | Ref.               | --          |    |             | Ref.                 | --          |    |             |
| Q2: 74.1 – 83.2                               | 1.07                | 0.96        | to | 1.19        | 1.04               | 0.94        | to | 1.16        | 1.11                 | 0.91        | to | 1.37        |
| Q3: 83.3 – 91.8                               | 1.09                | 0.98        | to | 1.22        | 1.01               | 0.89        | to | 1.13        | 1.03                 | 0.81        | to | 1.31        |
| Q4: >91.8                                     | <b>1.15</b>         | <b>1.02</b> | to | <b>1.29</b> | 0.98               | 0.85        | to | 1.13        | 0.99                 | 0.74        | to | 1.30        |
| <b>County % Population ≥65</b>                |                     |             |    |             |                    |             |    |             |                      |             |    |             |
| Q1: <11.1                                     | Ref.                | --          |    |             | Ref.               | --          |    |             | Ref.                 | --          |    |             |

|                                               |             |             |           |             |             |             |           |             |      |      |    |      |
|-----------------------------------------------|-------------|-------------|-----------|-------------|-------------|-------------|-----------|-------------|------|------|----|------|
| Q2: 11.1 – 12.8                               | 0.97        | 0.87        | to        | 1.07        | 0.96        | 0.88        | to        | 1.06        | 1.04 | 0.85 | to | 1.28 |
| Q3: 12.9 – 14.8                               | 0.96        | 0.86        | to        | 1.08        | 1.00        | 0.90        | to        | 1.11        | 1.08 | 0.88 | to | 1.33 |
| Q4: >14.8                                     | 0.94        | 0.83        | to        | 1.06        | 1.09        | 0.96        | to        | 1.24        | 0.88 | 0.70 | to | 1.11 |
| <b>County % Population below Poverty Line</b> |             |             |           |             |             |             |           |             |      |      |    |      |
| Q1: <9.2                                      | Ref.        |             |           | --          | Ref.        |             |           | --          | Ref. |      |    | --   |
| Q2: 9.2 – 11.9                                | <b>1.12</b> | <b>1.01</b> | <b>to</b> | <b>1.24</b> | 0.92        | 0.83        | to        | 1.01        | 0.99 | 0.80 | to | 1.23 |
| Q3: 12.0 – 15.0                               | <b>1.15</b> | <b>1.03</b> | <b>to</b> | <b>1.29</b> | 0.94        | 0.85        | to        | 1.04        | 0.92 | 0.75 | to | 1.14 |
| Q4: >15.0                                     | <b>1.18</b> | <b>1.07</b> | <b>to</b> | <b>1.31</b> | 1.00        | 0.91        | to        | 1.10        | 1.15 | 0.92 | to | 1.42 |
| <b>County # of MDs /1000 Population</b>       |             |             |           |             |             |             |           |             |      |      |    |      |
| Q1: <1.8                                      | Ref.        |             |           | --          | Ref.        |             |           | --          | Ref. |      |    | --   |
| Q2: 1.8 – 2.7                                 | 0.98        | 0.89        | to        | 1.07        | 0.98        | 0.89        | to        | 1.08        | 1.14 | 0.94 | to | 1.39 |
| Q3: 2.8 – 4.0                                 | 1.00        | 0.90        | to        | 1.11        | 0.93        | 0.84        | to        | 1.03        | 1.23 | 1.00 | to | 1.52 |
| Q4: >4.0                                      | 0.97        | 0.86        | to        | 1.09        | <b>0.86</b> | <b>0.76</b> | <b>to</b> | <b>0.96</b> | 0.82 | 0.63 | to | 1.05 |

| <b>INSURANCE PLAN CHARACTERISTICS</b>  |             |             |           |             |             |             |           |             |             |             |           |             |
|----------------------------------------|-------------|-------------|-----------|-------------|-------------|-------------|-----------|-------------|-------------|-------------|-----------|-------------|
| <b>Model Type</b>                      |             |             |           |             |             |             |           |             |             |             |           |             |
| Staff/Group                            | Ref.        |             |           | --          | Ref.        |             |           | --          | Ref.        |             |           | --          |
| Non-staff/Non-group                    | <b>1.13</b> | <b>1.01</b> | <b>to</b> | <b>1.27</b> | 1.03        | 0.88        | to        | 1.21        | 0.97        | 0.75        | to        | 1.25        |
| <b>Profit Status</b>                   |             |             |           |             |             |             |           |             |             |             |           |             |
| Not For Profit                         | Ref.        |             |           | --          | Ref.        |             |           | --          | Ref.        |             |           | --          |
| For Profit                             | 1.02        | 0.93        | to        | 1.12        | <b>1.16</b> | <b>1.04</b> | <b>to</b> | <b>1.29</b> | <b>1.32</b> | <b>1.11</b> | <b>to</b> | <b>1.58</b> |
| <b>Years Participating in Medicare</b> |             |             |           |             |             |             |           |             |             |             |           |             |
| <5                                     | Ref.        |             |           | --          | Ref.        |             |           | --          | Ref.        |             |           | --          |
| 5-10                                   | 1.01        | 0.90        | to        | 1.15        | 1.10        | 0.96        | to        | 1.26        | 0.91        | 0.74        | to        | 1.12        |
| >10                                    | 0.92        | 0.83        | to        | 1.03        | 1.02        | 0.89        | to        | 1.16        | 1.02        | 0.84        | to        | 1.25        |

\*Cochran-Armitage trend test for age effect p<0.05 for all three categories. Also controls for census division.

1  
2  
3  
4  
5  
6  
7  
8  
9  
10  
11  
12  
13  
14  
15  
16  
17  
18  
19  
20  
21  
22  
23  
24  
25  
26  
27  
28  
29  
30  
31  
32  
33  
34  
35  
36  
37  
38  
39  
40  
41  
42  
43  
44  
45  
46  
47  
48  
49

| SUPPLEMENTAL TABLE 5. Adjusted Odds of Receiving a High-Risk Prescription by Census Division among Elderly Medicare Advantage Beneficiaries |  |             |             |             |                 |             |             |                    |             |             |                    |             |             |                |             |             |                    |             |             |                    |             |             |             |             |             |             |             |             |
|---------------------------------------------------------------------------------------------------------------------------------------------|--|-------------|-------------|-------------|-----------------|-------------|-------------|--------------------|-------------|-------------|--------------------|-------------|-------------|----------------|-------------|-------------|--------------------|-------------|-------------|--------------------|-------------|-------------|-------------|-------------|-------------|-------------|-------------|-------------|
|                                                                                                                                             |  | New England |             |             | Middle Atlantic |             |             | East North Central |             |             | West North Central |             |             | South Atlantic |             |             | East South Central |             |             | West South Central |             |             | Mountain    |             |             | Pacific     |             |             |
|                                                                                                                                             |  | OR          | 95% CI      |             | OR              | 95% CI      |             | OR                 | 95% CI      |             | OR                 | 95% CI      |             | OR             | 95% CI      |             | OR                 | 95% CI      |             | OR                 | 95% CI      |             | OR          | 95% CI      |             |             |             |             |
| <b>Age*</b>                                                                                                                                 |  |             |             |             |                 |             |             |                    |             |             |                    |             |             |                |             |             |                    |             |             |                    |             |             |             |             |             |             |             |             |
| 65-69                                                                                                                                       |  | Ref.        |             |             | Ref.            |             |             | Ref.               |             |             | Ref.               |             |             | Ref.           |             |             | Ref.               |             |             | Ref.               |             |             | Ref.        |             |             | Ref.        |             |             |
| 70-74                                                                                                                                       |  | 1.05        | 0.76        | 1.46        | 0.87            | 0.75        | 1.01        | 0.99               | 0.87        | 1.13        | 1.06               | 0.86        | 1.29        | 0.91           | 0.77        | 1.09        | 1.04               | 0.79        | 1.38        | 0.75               | 0.57        | 0.98        | <b>0.78</b> | <b>0.65</b> | <b>0.93</b> | 0.93        | 0.79        | 1.10        |
| 75-79                                                                                                                                       |  | <b>0.84</b> | <b>0.74</b> | <b>0.96</b> | 0.86            | 0.75        | 1.00        | 1.08               | 0.93        | 1.25        | 1.10               | 0.93        | 1.30        | 0.98           | 0.82        | 1.17        | 1.06               | 0.78        | 1.44        | 0.96               | 0.71        | 1.32        | 0.94        | 0.75        | 1.18        | 0.91        | 0.76        | 1.09        |
| 80-85                                                                                                                                       |  | <b>0.65</b> | <b>0.45</b> | <b>0.94</b> | <b>0.77</b>     | <b>0.65</b> | <b>0.92</b> | 0.95               | 0.78        | 1.15        | 0.93               | 0.73        | 1.19        | 1.03           | 0.87        | 1.21        | 1.36               | 0.90        | 2.06        | <b>0.69</b>        | <b>0.55</b> | <b>0.88</b> | 0.94        | 0.78        | 1.14        | <b>0.80</b> | <b>0.67</b> | <b>0.96</b> |
| >85                                                                                                                                         |  | <b>0.53</b> | <b>0.32</b> | <b>0.88</b> | <b>0.60</b>     | <b>0.44</b> | <b>0.81</b> | <b>0.77</b>        | <b>0.61</b> | <b>0.96</b> | <b>0.73</b>        | <b>0.59</b> | <b>0.90</b> | 0.85           | 0.70        | 1.04        | 0.66               | 0.34        | 1.30        | <b>0.63</b>        | <b>0.46</b> | <b>0.88</b> | 0.71        | 0.51        | 1.00        | <b>0.60</b> | <b>0.48</b> | <b>0.75</b> |
| <b>Sex</b>                                                                                                                                  |  |             |             |             |                 |             |             |                    |             |             |                    |             |             |                |             |             |                    |             |             |                    |             |             |             |             |             |             |             |             |
| Male                                                                                                                                        |  | Ref.        |             |             | Ref.            |             |             | Ref.               |             |             | Ref.               |             |             | Ref.           |             |             | Ref.               |             |             | Ref.               |             |             | Ref.        |             |             | Ref.        |             |             |
| Female                                                                                                                                      |  | 0.93        | 0.68        | 1.28        | <b>1.32</b>     | <b>1.18</b> | <b>1.47</b> | <b>1.51</b>        | <b>1.32</b> | <b>1.72</b> | <b>1.33</b>        | <b>1.15</b> | <b>1.54</b> | <b>1.31</b>    | <b>1.14</b> | <b>1.50</b> | <b>1.17</b>        | <b>1.00</b> | <b>1.35</b> | <b>1.41</b>        | <b>1.15</b> | <b>1.75</b> | <b>1.45</b> | <b>1.25</b> | <b>1.68</b> | <b>1.40</b> | <b>1.18</b> | <b>1.66</b> |
| <b>Race</b>                                                                                                                                 |  |             |             |             |                 |             |             |                    |             |             |                    |             |             |                |             |             |                    |             |             |                    |             |             |             |             |             |             |             |             |
| White                                                                                                                                       |  | Ref.        |             |             | Ref.            |             |             | Ref.               |             |             | Ref.               |             |             | Ref.           |             |             | Ref.               |             |             | Ref.               |             |             | Ref.        |             |             | Ref.        |             |             |
| Black                                                                                                                                       |  | 0.82        | 0.47        | 1.40        | <b>0.79</b>     | <b>0.65</b> | <b>0.97</b> | 1.05               | 0.88        | 1.24        | 0.89               | 0.69        | 1.16        | 0.92           | 0.76        | 1.11        | 0.97               | 0.71        | 1.32        | 1.01               | 0.71        | 1.43        | 1.14        | 0.70        | 1.84        | 0.84        | 0.55        | 1.30        |
| Other                                                                                                                                       |  | 1.55        | 0.85        | 2.83        | 0.81            | 0.63        | 1.04        | 0.99               | 0.56        | 1.77        | <b>1.66</b>        | <b>1.08</b> | <b>2.56</b> | 0.87           | 0.61        | 1.22        | 1.03               | 0.49        | 2.17        | 0.97               | 0.74        | 1.28        | 1.13        | 0.88        | 1.46        | 0.82        | 0.65        | 1.05        |
| <b>Marital Status</b>                                                                                                                       |  |             |             |             |                 |             |             |                    |             |             |                    |             |             |                |             |             |                    |             |             |                    |             |             |             |             |             |             |             |             |
| Single/Widowed/<br>Divorced                                                                                                                 |  | Ref.        |             |             | Ref.            |             |             | Ref.               |             |             | Ref.               |             |             | Ref.           |             |             | Ref.               |             |             | Ref.               |             |             | Ref.        |             |             | Ref.        |             |             |
| Married                                                                                                                                     |  | 1.02        | 0.88        | 1.18        | 1.13            | 0.97        | 1.31        | 1.10               | 0.93        | 1.29        | 1.10               | 0.95        | 1.26        | 1.02           | 0.88        | 1.17        | 0.89               | 0.72        | 1.10        | <b>1.30</b>        | <b>1.12</b> | <b>1.50</b> | 1.04        | 0.87        | 1.23        | 1.02        | 0.89        | 1.17        |
| <b>Annual Household Income</b>                                                                                                              |  |             |             |             |                 |             |             |                    |             |             |                    |             |             |                |             |             |                    |             |             |                    |             |             |             |             |             |             |             |             |
| <\$10,000                                                                                                                                   |  | Ref.        |             |             | Ref.            |             |             | Ref.               |             |             | Ref.               |             |             | Ref.           |             |             | Ref.               |             |             | Ref.               |             |             | Ref.        |             |             | Ref.        |             |             |
| \$10,000 - \$19,999                                                                                                                         |  | 0.92        | 0.67        | 1.27        | 0.80            | 0.64        | 1.00        | 0.97               | 0.81        | 1.15        | 1.06               | 0.83        | 1.36        | 1.05           | 0.83        | 1.31        | 0.90               | 0.65        | 1.24        | 1.11               | 0.92        | 1.33        | 0.92        | 0.73        | 1.15        | 1.14        | 0.92        | 1.42        |
| \$20,000 - \$29,999                                                                                                                         |  | 0.71        | 0.50        | 1.02        | <b>0.81</b>     | <b>0.67</b> | <b>0.98</b> | 0.90               | 0.73        | 1.10        | 0.91               | 0.69        | 1.20        | 1.05           | 0.83        | 1.33        | <b>0.70</b>        | <b>0.53</b> | <b>0.92</b> | 0.95               | 0.65        | 1.37        | 0.95        | 0.76        | 1.19        | 0.98        | 0.76        | 1.26        |
| ≥\$30,000                                                                                                                                   |  | <b>0.74</b> | <b>0.55</b> | <b>0.98</b> | 0.83            | 0.66        | 1.05        | <b>0.78</b>        | <b>0.64</b> | <b>0.96</b> | 1.01               | 0.82        | 1.23        | 0.84           | 0.66        | 1.07        | 1.06               | 0.70        | 1.61        | 1.01               | 0.69        | 1.47        | 0.89        | 0.70        | 1.11        | 1.14        | 0.93        | 1.41        |
| <b>Education</b>                                                                                                                            |  |             |             |             |                 |             |             |                    |             |             |                    |             |             |                |             |             |                    |             |             |                    |             |             |             |             |             |             |             |             |
| No College Education                                                                                                                        |  | Ref.        |             |             | Ref.            |             |             | Ref.               |             |             | Ref.               |             |             | Ref.           |             |             | Ref.               |             |             | Ref.               |             |             | Ref.        |             |             | Ref.        |             |             |
| Any College Education                                                                                                                       |  | 1.03        | 0.83        | 1.28        | 0.98            | 0.85        | 1.13        | 0.91               | 0.82        | 1.00        | 1.02               | 0.88        | 1.20        | 1.01           | 0.89        | 1.15        | 0.98               | 0.79        | 1.21        | <b>0.84</b>        | <b>0.76</b> | <b>0.93</b> | 0.94        | 0.85        | 1.03        | 0.94        | 0.83        | 1.07        |
| <b>Physical Component Summary (PCS) Score</b>                                                                                               |  |             |             |             |                 |             |             |                    |             |             |                    |             |             |                |             |             |                    |             |             |                    |             |             |             |             |             |             |             |             |
| <30                                                                                                                                         |  | Ref.        |             |             | Ref.            |             |             | Ref.               |             |             | Ref.               |             |             | Ref.           |             |             | Ref.               |             |             | Ref.               |             |             | Ref.        |             |             | Ref.        |             |             |
| 30 - 40                                                                                                                                     |  | <b>0.64</b> | <b>0.45</b> | <b>0.93</b> | <b>0.83</b>     | <b>0.72</b> | <b>0.96</b> | <b>0.77</b>        | <b>0.66</b> | <b>0.90</b> | 0.94               | 0.79        | 1.12        | <b>0.74</b>    | <b>0.64</b> | <b>0.85</b> | 0.78               | 0.58        | 1.04        | 0.94               | 0.68        | 1.29        | 1.01        | 0.83        | 1.23        | 0.89        | 0.77        | 1.03        |
| 41 - 49                                                                                                                                     |  | 0.86        | 0.60        | 1.24        | <b>0.61</b>     | <b>0.51</b> | <b>0.73</b> | <b>0.67</b>        | <b>0.56</b> | <b>0.79</b> | <b>0.78</b>        | <b>0.68</b> | <b>0.91</b> | <b>0.70</b>    | <b>0.58</b> | <b>0.83</b> | 0.83               | 0.55        | 1.25        | <b>0.65</b>        | <b>0.50</b> | <b>0.83</b> | <b>0.75</b> | <b>0.62</b> | <b>0.90</b> | 0.97        | 0.79        | 1.19        |
| >49                                                                                                                                         |  | <b>0.55</b> | <b>0.43</b> | <b>0.70</b> | <b>0.55</b>     | <b>0.44</b> | <b>0.69</b> | <b>0.57</b>        | <b>0.51</b> | <b>0.64</b> | <b>0.54</b>        | <b>0.45</b> | <b>0.64</b> | <b>0.62</b>    | <b>0.51</b> | <b>0.76</b> | <b>0.58</b>        | <b>0.40</b> | <b>0.84</b> | <b>0.63</b>        | <b>0.50</b> | <b>0.79</b> | <b>0.64</b> | <b>0.50</b> | <b>0.82</b> | <b>0.71</b> | <b>0.56</b> | <b>0.89</b> |
| <b>Mental Component Summary (MCS) Score</b>                                                                                                 |  |             |             |             |                 |             |             |                    |             |             |                    |             |             |                |             |             |                    |             |             |                    |             |             |             |             |             |             |             |             |
| <45                                                                                                                                         |  | Ref.        |             |             | Ref.            |             |             | Ref.               |             |             | Ref.               |             |             | Ref.           |             |             | Ref.               |             |             | Ref.               |             |             | Ref.        |             |             | Ref.        |             |             |

|    |                                        |             |             |             |             |             |             |             |             |             |             |             |             |             |             |             |             |             |             |             |             |             |             |             |             |             |             |             |
|----|----------------------------------------|-------------|-------------|-------------|-------------|-------------|-------------|-------------|-------------|-------------|-------------|-------------|-------------|-------------|-------------|-------------|-------------|-------------|-------------|-------------|-------------|-------------|-------------|-------------|-------------|-------------|-------------|-------------|
| 1  | 45-55                                  | 1.05        | 0.81        | 1.37        | 0.88        | 0.77        | 1.00        | 0.86        | 0.74        | 1.01        | 0.95        | 0.81        | 1.11        | 0.86        | 0.72        | 1.03        | 0.94        | 0.77        | 1.13        | 0.97        | 0.70        | 1.35        | 1.08        | 0.88        | 1.33        | 0.86        | 0.73        | 1.01        |
| 2  | 56-60                                  | 0.71        | 0.47        | 1.10        | 1.03        | 0.86        | 1.24        | 0.85        | 0.71        | 1.02        | 1.01        | 0.83        | 1.23        | 0.85        | 0.72        | 1.01        | 0.84        | 0.68        | 1.03        | 0.77        | 0.55        | 1.09        | 1.04        | 0.78        | 1.38        | <b>0.77</b> | <b>0.62</b> | <b>0.97</b> |
| 3  | >60                                    | 0.85        | 0.62        | 1.16        | 0.90        | 0.75        | 1.08        | <b>0.77</b> | <b>0.65</b> | <b>0.92</b> | 0.85        | 0.71        | 1.02        | <b>0.73</b> | <b>0.62</b> | <b>0.85</b> | 0.85        | 0.68        | 1.06        | <b>0.68</b> | <b>0.47</b> | <b>0.92</b> | 0.92        | 0.79        | 1.08        | <b>0.79</b> | <b>0.66</b> | <b>0.93</b> |
| 4  | <b>Number of Chronic Conditions</b>    |             |             |             |             |             |             |             |             |             |             |             |             |             |             |             |             |             |             |             |             |             |             |             |             |             |             |             |
| 5  | <Median (<3)                           | Ref.        |             |             | Ref.        |             |             | Ref.        |             |             | Ref.        |             |             | Ref.        |             | Ref.        |             |             | Ref.        |             |             | Ref.        |             |             | Ref.        |             |             |             |
| 6  | ≥Median (≥3)                           | <b>1.29</b> | <b>1.09</b> | <b>1.53</b> | <b>1.43</b> | <b>1.24</b> | <b>1.64</b> | <b>1.25</b> | <b>1.13</b> | <b>1.38</b> | <b>1.23</b> | <b>1.08</b> | <b>1.40</b> | <b>1.32</b> | <b>1.10</b> | <b>1.58</b> | 1.19        | 0.92        | 1.56        | 1.19        | 1.00        | 1.41        | <b>1.40</b> | <b>1.12</b> | <b>1.76</b> | <b>1.33</b> | <b>1.11</b> | <b>1.60</b> |
| 7  | <b>Model Type</b>                      |             |             |             |             |             |             |             |             |             |             |             |             |             |             |             |             |             |             |             |             |             |             |             |             |             |             |             |
| 8  | Staff/Group                            | Ref.        |             |             | Ref.        |             |             | Ref.        |             |             | Ref.        |             |             | Ref.        |             | Ref.        |             |             | Ref.        |             |             | Ref.        |             |             | Ref.        |             |             |             |
| 9  | Non-staff/Non-group                    | <b>1.52</b> | <b>1.23</b> | <b>1.89</b> | 1.05        | 0.87        | 1.28        | 1.09        | 0.86        | 1.37        | 1.08        | 0.84        | 1.23        | <b>0.73</b> | <b>0.57</b> | <b>0.94</b> | <b>1.18</b> | <b>1.01</b> | <b>1.38</b> | 1.12        | 0.90        | 1.38        | 1.08        | 0.84        | 1.38        | 1.11        | 0.97        | 1.27        |
| 10 | <b>Profit Status</b>                   |             |             |             |             |             |             |             |             |             |             |             |             |             |             |             |             |             |             |             |             |             |             |             |             |             |             |             |
| 11 | Not For Profit                         | Ref.        |             |             | Ref.        |             |             | Ref.        |             |             | Ref.        |             |             | Ref.        |             | Ref.        |             |             | Ref.        |             |             | Ref.        |             |             | Ref.        |             |             |             |
| 12 | For Profit                             | 0.94        | 0.78        | 1.13        | <b>0.79</b> | <b>0.67</b> | <b>0.93</b> | 1.13        | 0.94        | 1.36        | <b>1.44</b> | <b>1.17</b> | <b>1.77</b> | 1.02        | 0.86        | 1.22        | NA          |             | <b>1.50</b> | <b>1.18</b> | <b>1.90</b> | 1.18        | 1.00        | 1.38        | 1.10        | 0.97        | 1.26        |             |
| 13 | <b>Years Participating in Medicare</b> |             |             |             |             |             |             |             |             |             |             |             |             |             |             |             |             |             |             |             |             |             |             |             |             |             |             |             |
| 14 | <5                                     | Ref.        |             |             | Ref.        |             |             | Ref.        |             |             | Ref.        |             |             | Ref.        |             | Ref.        |             |             | Ref.        |             |             | Ref.        |             |             | Ref.        |             |             |             |
| 15 | 5-10                                   | <b>1.46</b> | <b>1.22</b> | <b>1.74</b> | <b>1.43</b> | <b>1.15</b> | <b>1.78</b> | 1.05        | 0.85        | 1.30        | 1.00        | 0.81        | 1.24        | 1.02        | 0.79        | 1.33        | 1.00        | 0.73        | 1.39        | 1.14        | 0.81        | 1.59        | 1.07        | 0.91        | 1.26        | 0.96        | 0.73        | 1.28        |
| 16 | >10                                    | 0.98        | 0.89        | 1.08        | <b>1.23</b> | <b>1.02</b> | <b>1.50</b> | 0.90        | 0.72        | 1.12        | 0.90        | 0.75        | 1.07        | 0.98        | 0.80        | 1.21        | 1.28        | 0.95        | 1.73        | 1.19        | 0.98        | 1.43        | 0.93        | 0.79        | 1.10        | 0.93        | 0.71        | 1.22        |

\*Cochran-Armitage trend test for age effect p<0.05 for all census divisions except East South Central, West South Central and Mountain. Also controls for community characteristics.

1  
2  
3  
4  
5  
6  
7  
8  
9  
10  
11  
12  
13  
14  
15  
16  
17  
18  
19  
20  
21  
22  
23  
24  
25  
26  
27  
28  
29  
30  
31  
32  
33  
34  
35  
36  
37  
38  
39  
40  
41  
42  
43  
44  
45  
46  
47  
48  
49  
50  
51  
52  
53  
54  
55  
56  
57  
58  
59  
60

| <b>Drug Class</b>                                   | <b>New Users</b> | <b>%</b>     |
|-----------------------------------------------------|------------------|--------------|
| Opiates                                             | 3,521            | 29.2         |
| Skeletal Muscle Relaxants                           | 2,727            | 22.6         |
| Antihistamines                                      | 2,272            | 18.9         |
| Gastrointestinal Drugs (incl. Belladonna Alkaloids) | 783              | 6.6          |
| Anticholinergics                                    | 764              | 6.3          |
| Tricyclic Antidepressants                           | 710              | 5.9          |
| NSAIDs                                              | 675              | 5.6          |
| Anticoagulants                                      | 286              | 2.4          |
| Benzodiazepines                                     | 206              | 1.7          |
| Antiemetics                                         | 56               | 0.5          |
| Antihypertensives                                   | 28               | 0.2          |
| Antiarrhythmics                                     | 10               | 0.1          |
| Hypoglycemics                                       | 2                | 0.0          |
| <b>TOTAL</b>                                        | <b>12,040</b>    | <b>100.0</b> |



1 SUPPLEMENTAL FIGURE 1. Study timeline.  
2  
3  
4

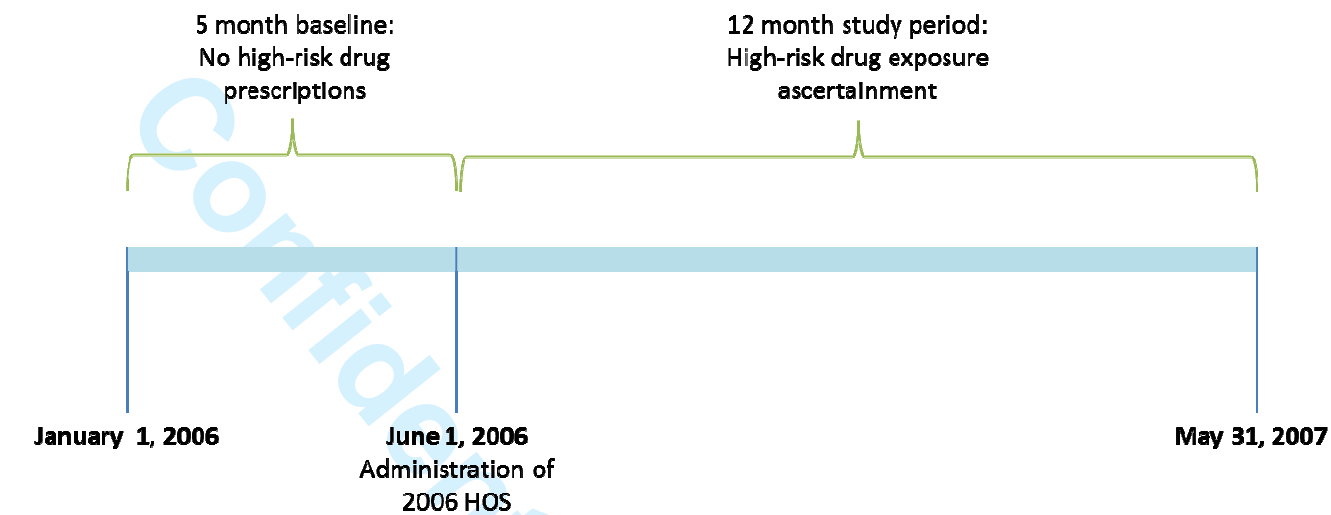

21  
22 HOS: Health Outcomes Survey  
23  
24  
25  
26  
27  
28  
29  
30  
31  
32  
33  
34  
35  
36  
37  
38  
39  
40  
41  
42  
43  
44  
45  
46  
47  
48  
49  
50  
51  
52  
53  
54  
55  
56  
57  
58  
59  
60
